# Supplementary material
Source: Royal Society of Chemistry journal article supplement (doi:10.1039/d6pm00042h)

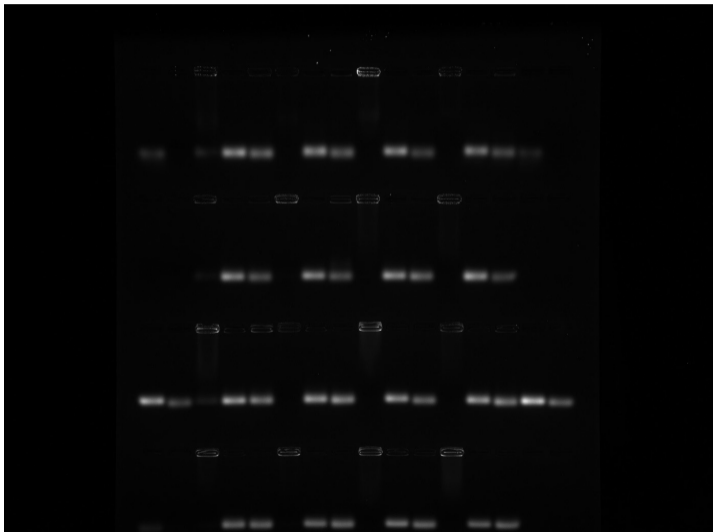

Supplement: d6pm00042h1.pdf [file d6pm00042h1.pdf]
